# Supplementary material
Source: PubMed Central journal article supplement (PMC8014194)
Supplement: jamasurg-e210254-s001.pdf [file jamasurg-e210254-s001.pdf]

---

## Supplemental Online Content

Liu Y-y, King J, Kline GA, et al. Outcomes of a specialized clinic on rates of investigation and treatment of primary aldosteronism. *JAMA Surg*. Published online March 31, 2021. doi:10.1001/jamasurg.2021.0254

**eFigure.** The typical diagnostic and treatment pathway for primary aldosteronism

**eTable 1.** People with hypertension who were investigated and treated for primary aldosteronism in Alberta

**eTable 2.** Demographic and clinical factors affecting the detection rate stratified according to zone of residence

This supplemental material has been provided by the authors to give readers additional information about their work.

eFigure. The typical diagnostic and treatment pathway for primary aldosteronism

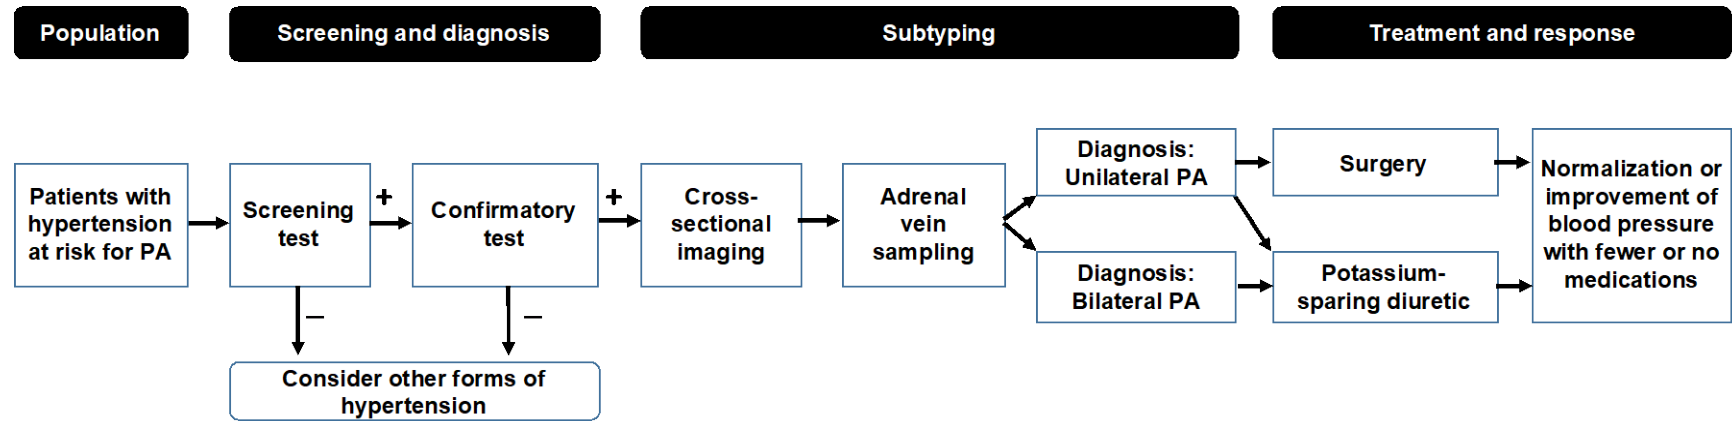

**eTable 1. People with hypertension who were investigated and treated for primary aldosteronism in Alberta**

| <b>Group</b>                                                      | <b>Number of people</b> | <b>Proportion,<br/>% (95% CI)</b> |
|-------------------------------------------------------------------|-------------------------|-----------------------------------|
| Prevalence of hypertension in Alberta <sup>a</sup>                | 1,070,783               | 29.2% (29.1, 29.2)                |
| <b>Screening among those with hypertension</b>                    |                         |                                   |
| Received ARR                                                      | 7,941                   | 0.7% (0.7, 0.8)                   |
| Elevated ARR among those screened                                 | 1,703                   | 21.4% (20.5, 22.4)                |
| <b>Subtyping among those who had positive ARR screen</b>          |                         |                                   |
| Received CT or MRI of the abdomen                                 | 975                     | 57.2% (54.9, 59.6)                |
| Received adrenal vein sampling                                    | 250                     | 14.7% (13.0, 16.4)                |
| Received any subtyping                                            | 1,005                   | 59.0% (56.6, 61.4)                |
| <b>Targeted treatment among those who had positive ARR screen</b> |                         |                                   |
| Received potassium-sparing diuretic                               | 692                     | 40.6% (38.3, 43.0)                |
| Received adrenalectomy                                            | 120                     | 7.0% (5.9, 8.4)                   |
| Received any targeted treatment                                   | 731                     | 42.9% (40.6, 45.3)                |
| <b>Targeted treatment among those who had any subtyping</b>       |                         |                                   |
| Received potassium-sparing diuretic                               | 500                     | 49.7% (46.6, 52.9)                |
| Received adrenalectomy                                            | 120                     | 11.9% (10.0, 14.1)                |
| Received any targeted treatment                                   | 539                     | 53.6% (50.5, 56.7)                |

<sup>a</sup> Denominator based on 3,671,886, the number of insured beneficiaries of Alberta healthcare aged 18 years and older in the fiscal year end of 2019. **Abbreviations:** ARR, aldosterone-to-renin ratio; CI, confidence interval; CT, computed tomography; MRI, magnetic resonance imaging.

**Table 2. Demographic and clinical factors affecting the detection rate stratified according to zone of residence**

| Overall                                                           |                         | Zone of Residence <sup>a</sup>        |                    |                    |                    |                    |                    |
|-------------------------------------------------------------------|-------------------------|---------------------------------------|--------------------|--------------------|--------------------|--------------------|--------------------|
|                                                                   |                         | South                                 | Calgary            | Central            | Edmonton           | North              |                    |
| Patients screened                                                 | No.                     | 154                                   | 6,317              | 286                | 925                | 223                |                    |
|                                                                   | % (95% CI) <sup>b</sup> | 1.9% (1.6, 2.3)                       | 79.9% (79.0, 80.8) | 3.6% (3.2, 4.1)    | 11.7% (11.0, 12.4) | 2.8% (2.5, 3.2)    |                    |
| Proportion of positive cases among patients screened in each zone | No.                     | 28                                    | 1,468              | 40                 | 133                | 27                 |                    |
|                                                                   | % (95% CI)              | 18.2% (12.4, 25.2)                    | 23.2% (22.2, 24.3) | 14.0% (10.2, 18.6) | 14.4% (12.2, 16.8) | 12.1% (8.1, 17.1)  |                    |
| Demographic Factors Associated with Positive Screening            |                         |                                       |                    |                    |                    |                    |                    |
| Age                                                               | <40                     | No. of positive cases / people tested | 6/51               | 283/1,716          | 7/87               | 34/265             | 7/73               |
|                                                                   |                         | % (95% CI)                            | 11.8% (4.4, 23.9)  | 16.5% (14.8, 18.3) | 8.0% (3.3, 15.9)   | 12.8% (9.1, 17.5)  | 9.6% (3.9, 18.8)   |
|                                                                   | 40-59                   | No. of positive cases / people tested | 16/59              | 651/2,555          | 16/107             | 63/350             | 12/92              |
|                                                                   |                         | % (95% CI)                            | 27.1% (16.5, 40.3) | 25.5% (23.8, 27.2) | 14.9% (8.8, 23.1)  | 18.0% (14.1, 22.4) | 13.0% (6.9, 21.7)  |
|                                                                   | >59                     | No. of positive cases / people tested | 6/44               | 534/2,046          | 17/92              | 36/310             | 8/58               |
|                                                                   |                         | % (95% CI)                            | 13.6% (5.2, 27.4)  | 26.1% (24.2, 28.1) | 18.5% (11.1, 27.9) | 11.6% (8.3, 15.7)  | 13.8% (6.2, 25.4%) |
| Sex                                                               | Female                  | No. of positive cases / people tested | 12/70              | 828/3,327          | 25/167             | 73/485             | 16/101             |
|                                                                   |                         | % (95% CI)                            | 17.1% (9.2, 28.0)  | 24.9% (23.4, 26.4) | 15.0% (9.9, 21.3)  | 15.1% (12.0, 18.6) | 15.8% (9.3, 24.5)  |
|                                                                   | Male                    | No. of positive cases / people tested | 16/84              | 640/2,990          | 15/119             | 60/440             | 11/122             |
|                                                                   |                         | % (95% CI)                            | 19.1% (11.3, 29.1) | 21.4% (19.9, 22.9) | 12.6% (7.2, 18.0)  | 13.6% (10.6, 16.6) | 9.0% (4.6, 13.4)   |

|                                                            |               |                                       | 22.9)              | 19.9)              | 17.2)              | 15.6)              |                    |
|------------------------------------------------------------|---------------|---------------------------------------|--------------------|--------------------|--------------------|--------------------|--------------------|
| <b>Clinical Factors Associated with Positive Screening</b> |               |                                       |                    |                    |                    |                    |                    |
| Hypokalemia                                                | Present       | No. of positive cases / people tested | 14/75              | 660/2,170          | 21/90              | 74/371             | 16/74              |
|                                                            |               | % (95% CI)                            | 18.7% (10.6, 29.3) | 30.4% (28.5, 32.4) | 18.9% (12.1, 27.5) | 20.0% (16.0, 24.4) | 21.6% (12.9, 32.7) |
|                                                            | Absent        | No. of positive cases / people tested | 14/79              | 808/4,147          | 19/175             | 59/554             | 11/149             |
|                                                            |               | % (95% CI)                            | 17.7% (10.0, 27.9) | 19.5% (18.3, 20.7) | 10.9% (6.7, 16.4)  | 10.7% (8.2, 13.5)  | 7.4% (3.7, 12.8)   |
| No. of anti-hypertensive drugs                             | <3            | No. of positive cases / people tested | 15/107             | 977/4,749          | 26/221             | 90/686             | 17/163             |
|                                                            |               | % (95% CI)                            | 14.0% (8.1, 22.1)  | 20.6% (19.4, 21.8) | 11.8% (7.8, 16.8)  | 13.1% (10.7, 15.9) | 10.4% (6.2, 16.2)  |
|                                                            | ≥3            | No. of positive cases / people tested | 13/47              | 491/1,568          | 14/65              | 43/239             | 10/60              |
|                                                            |               | % (95% CI)                            | 27.7% (15.6, 42.6) | 31.3% (29.0, 33.7) | 21.5% (12.3, 33.5) | 18.0% (13.3, 23.5) | 16.7% (8.3, 28.5)  |
| Specialty ordering screening test                          | Family        | No. of positive cases / people tested | 6/36               | 399/1,860          | 9/82               | 20/176             | 9/82               |
|                                                            |               | % (95% CI)                            | 16.7% (6.4, 32.8)  | 21.5% (19.6, 23.4) | 11.0% (5.1, 19.8)  | 11.4% (7.1, 17.0)  | 11.0% (5.1, 19.8)  |
|                                                            | Card/Neph/GIM | No. of positive cases / people tested | 10/65              | 632/2,558          | 14/108             | 81/542             | 11/92              |
|                                                            |               | % (95% CI)                            | 15.4% (7.6, 26.5)  | 24.7% (23.1, 26.4) | 13.0% (7.3, 20.8)  | 14.9% (12.1, 18.2) | 12.0% (6.1, 20.4)  |
|                                                            | Endo          | No. of                                | 4/14               | 221/941            | 13/63              | 24/117             | 4/24               |

|  |       |                                       |                   |                    |                    |                    |                   |
|--|-------|---------------------------------------|-------------------|--------------------|--------------------|--------------------|-------------------|
|  |       | positive cases / people tested        |                   |                    |                    |                    |                   |
|  |       | % (95% CI)                            | 28.6% (8.4, 58.1) | 23.5% (20.8, 26.3) | 20.6% (11.5, 32.7) | 20.5% (13.6, 29.0) | 16.7% (4.7, 37.4) |
|  | Other | No. of positive cases / people tested | 8/39              | 216/958            | 4/33               | 8/90               | 3/25              |
|  |       | % (95% CI)                            | 20.5% (9.3, 36.5) | 22.6% (19.9, 25.3) | 12.1% (3.4, 28.2)  | 8.9% (3.9, 16.8)   | 12.0% (2.6, 31.2) |

<sup>a</sup> 36 patients who were screened had no zone listed and 7 patients with positive screening had no zone listed.

<sup>b</sup> Percentage of people screened in each zone among all people screened in the province.

**Abbreviations:** ARR, aldosterone-to-renin ratio; Card, cardiology; CI, confidence interval; Endo, endocrinology; GIM, general internal medicine; Neph, nephrology.
